# Supplementary material for: Enhancing remnant polarization in ferroelectric Hf 0.5 Zr 0.5 O 2 thin films by oxygen-diffusive interlayers
Source: Royal Society of Chemistry journal article supplement (doi:10.1039/d5tc03304g), 2025-11-17
Supplement: d5tc03304g1.pdf [file d5tc03304g1.pdf]

*Supporting information for*

**Enhancing remnant polarization in ferroelectric  $\text{Hf}_{0.5}\text{Zr}_{0.5}\text{O}_2$  thin films by  
oxygen-diffusive interlayers**

Utaek Cho<sup>1, 2</sup>, Joonyong Kim<sup>1, 2, 5</sup>, Taegyu Kwon<sup>1, 2, 5</sup>, Pyeongkang Hur<sup>3</sup>, Daseob Yoon<sup>4</sup>, Min  
Hyuk Park<sup>1, 2, 5, \*</sup>, and Junwoo Son<sup>1, 2, \*</sup>

<sup>1</sup> Department of Materials Science and Engineering, Seoul National University, Seoul 08826,  
Republic of Korea

<sup>2</sup> Research Institute of Advanced Materials, Seoul National University, Seoul 08826, Republic of  
Korea

<sup>3</sup> Department of Materials Science and Engineering, Pohang University of Science and  
Technology (POSTECH), Pohang 37673, Republic of Korea

<sup>4</sup> Department of Electrical Engineering, Display and Semiconductor Engineering, Pukyong  
National University, Busan 48513, Republic of Korea

<sup>5</sup> Institute of Engineering Research, College of Engineering, Seoul National University, Seoul  
08826, Republic of Korea

\* [minhyuk.park@snu.ac.kr](mailto:minhyuk.park@snu.ac.kr)

\* [junuson@snu.ac.kr](mailto:junuson@snu.ac.kr)

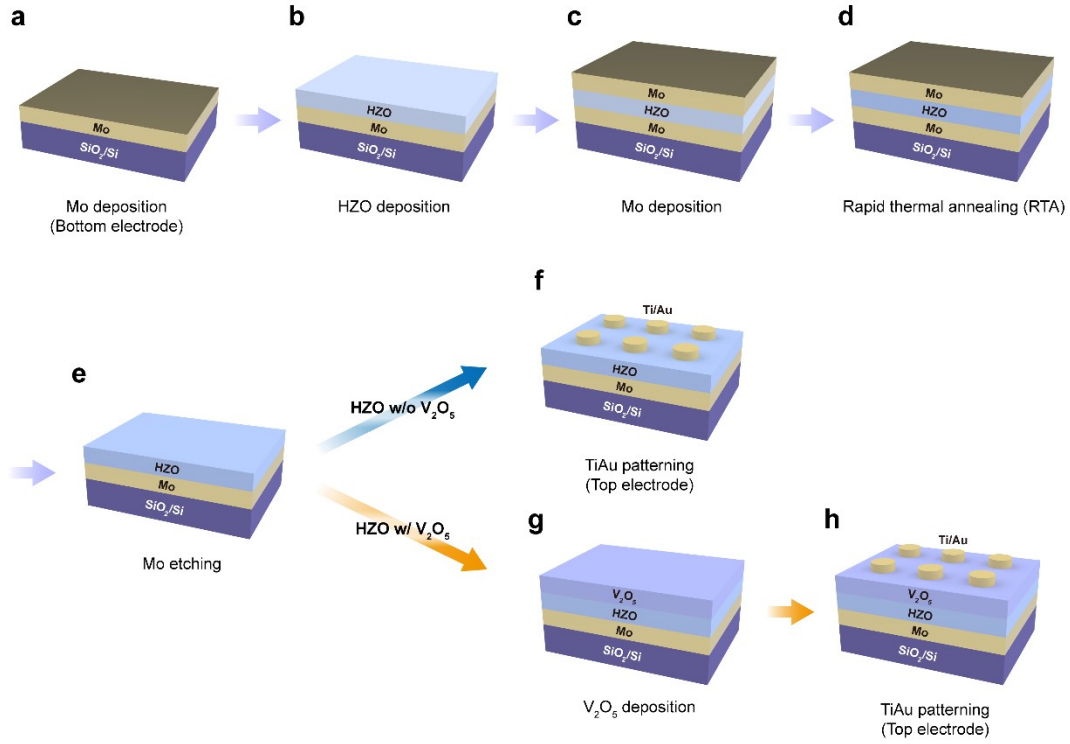

**Figure S1 | Schematic fabrication process of HZO capacitors with and without V<sub>2</sub>O<sub>5</sub>.** **a**, Mo bottom electrode was deposited using a direct current sputtering on bare SiO<sub>2</sub>/Si substrate. **b**, HZO was grown using thermal ALD with a substrate temperature of 300 °C. **c**, The Mo top electrode was deposited under the same conditions as the Mo bottom electrode. **d**, The heterostructure of Mo/HZO/Mo/SiO<sub>2</sub>/Si was annealed at 500 °C for 30 s using RTP to crystallize HZO film. **e**, Top Mo was etched in an etchant composed of H<sub>3</sub>PO<sub>4</sub>, HNO<sub>3</sub>, CH<sub>3</sub>COOH, and DI water. **f**, For HZO without V<sub>2</sub>O<sub>5</sub>, Ti/Au top electrodes were deposited on HZO using a lift-off process by thermal evaporator. **g**, For V<sub>2</sub>O<sub>5</sub>/HZO, V<sub>2</sub>O<sub>5</sub> layer was deposited on HZO by PLD at 300 °C. **h**, Subsequently, Ti/Au top electrodes were deposited on top of V<sub>2</sub>O<sub>5</sub>/HZO/Mo/SiO<sub>2</sub>/Si structure using the same lift-off process described in **f**. In the fabrication process, HZO layer was intentionally annealed between the Mo electrodes prior to V<sub>2</sub>O<sub>5</sub> deposition, aiming to minimize clamping effect induced by the V<sub>2</sub>O<sub>5</sub> layer during RTP and to clearly evaluate the intrinsic effect of oxygen diffusion. Detailed experimental conditions are described in the Methods section.

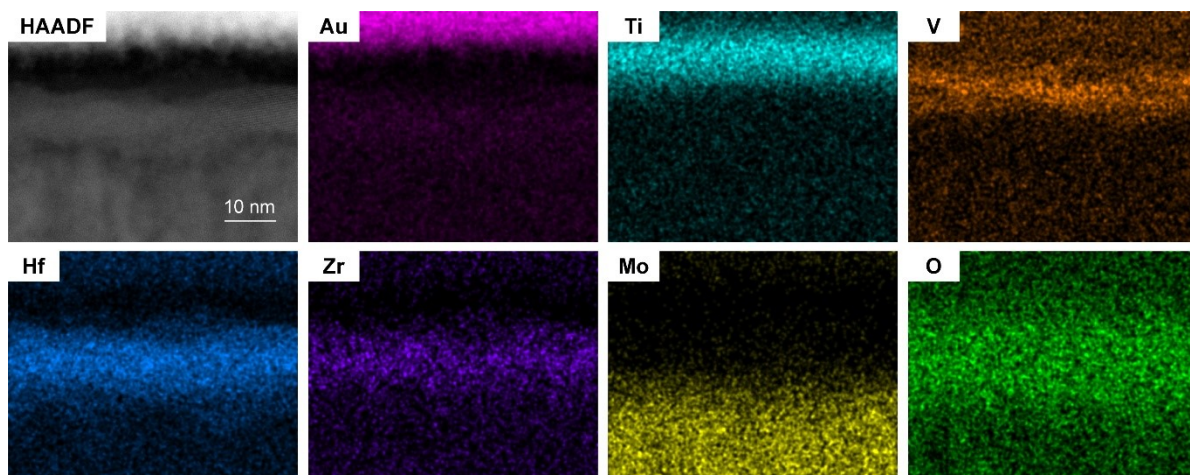

**Figure S2 | The cross-sectional STEM image and corresponding EDS mapping of  $V_2O_5$ /HZO capacitor with Ti/Au top electrode and Mo bottom electrode.** HAADF contrast exhibits a layered structure, as supported by EDS elemental mapping. From top to bottom, Au, Ti, V, (Hf, Zr), and Mo are sequentially distributed, while oxygen is primarily located in the regions excluding the metal electrode.

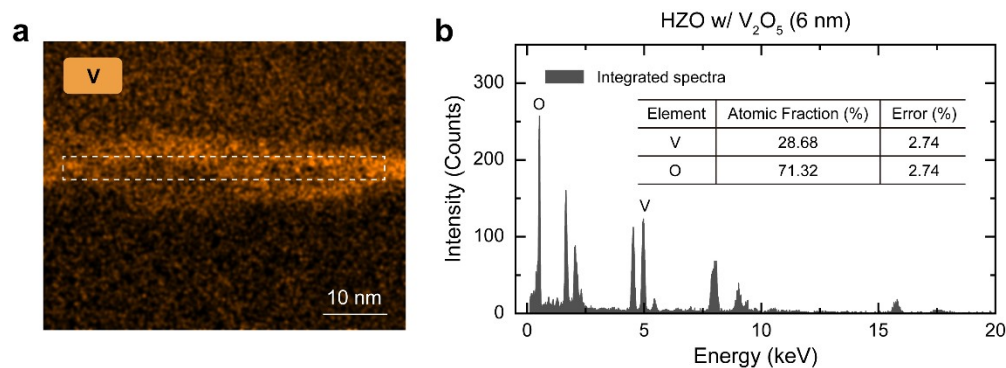

**Figure S3 | The cross-sectional EDS analysis of vanadium oxide layer in  $V_2O_5$ /HZO capacitor. **a**, Element mapping of V element, and **b**, average EDS spectrum of vanadium oxide layer. The EDS spectrum was acquired from white dashed box in **a**, confirming that stoichiometric  $V_2O_5$  was formed in vanadium oxide layer (see the inset in **b**).**

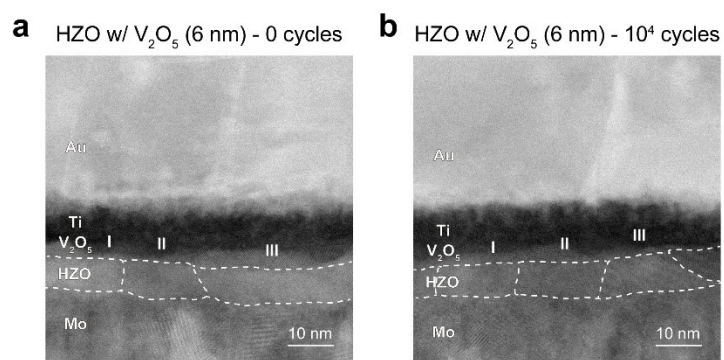

**Figure S4 | HAADF images of  $\text{V}_2\text{O}_5$ /HZO capacitors marked with grain boundary.** The grain boundaries of the HZO layer are indicated by white dashed lines in the HAADF images of the samples shown in **a**, before wakeup, and **b**, after wakeup of  $10^4$  cycles.

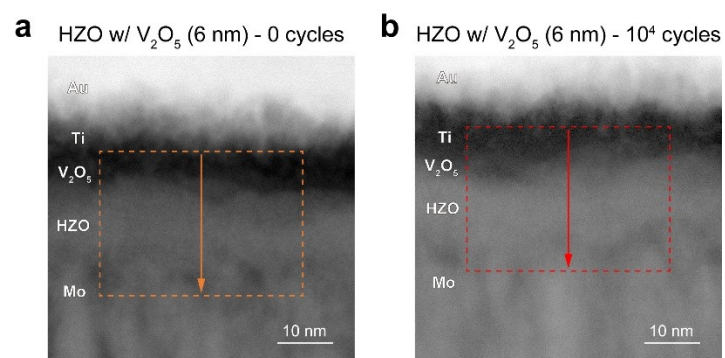

**Figure S5 | HAADF images of  $\text{V}_2\text{O}_5$ /HZO capacitors marked with EDS scan range in the vertical direction.** Cross-sectional HAADF-STEM images for EDS line profile. The average EDS profile corresponds to the **a**, orange (0 cycles) and **b**, red ( $10^4$  cycles) dashed rectangular area.

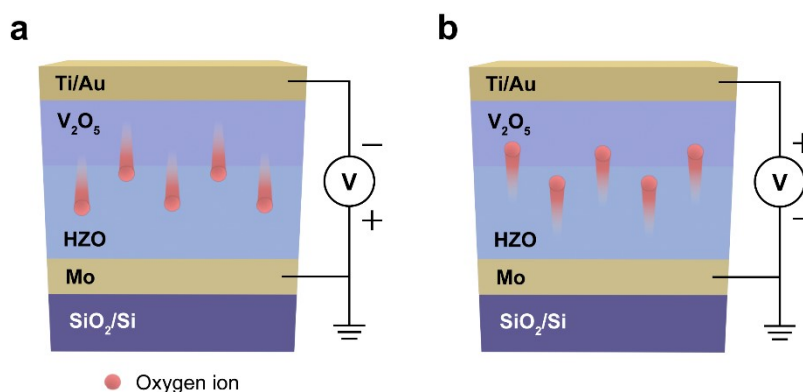

**Figure S6 | Schematic of the oxygen ion migration direction in the  $V_2O_5$ /HZO capacitor under different bias conditions. a,** When a negative voltage is applied to the top electrode, oxygen ions migrate from the  $V_2O_5$  layer toward the HZO layer, leading to the partial reduction of  $V^{5+}$  to  $V^{4+}$  in  $V_2O_5$  layer. **b,** Conversely, when a positive voltage is applied to the top electrode, oxygen ions drift from the HZO layer toward the  $V_2O_5$  layer, resulting in the re-oxidation of  $V^{4+}$  to  $V^{5+}$ . Repeated cycling of this process induces the rearrangement of oxygen distribution and the reversible change in the vanadium valence state at the  $V_2O_5$ /HZO interface.

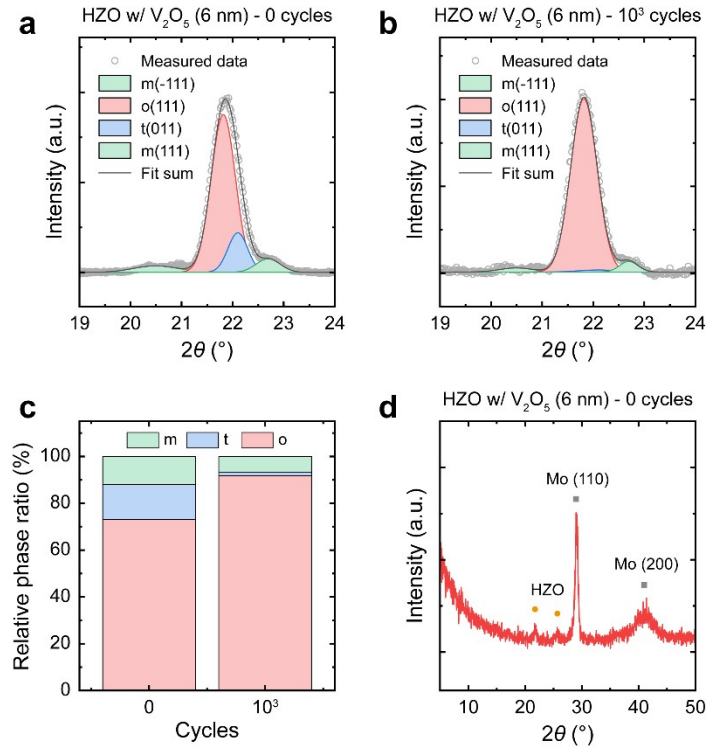

**Figure S7 | GIXRD spectra measured before and after wakeup cycles.** Deconvoluted GIXRD spectrum of V<sub>2</sub>O<sub>5</sub> (6 nm)/HZO with 0 cycles in **a**, and 10<sup>3</sup> cycles in **b**, showing the coexistence of m(-111), m(111), o(111), and t(011) phases. To match the large X-ray beam spot size in grazing incidence geometry, the top electrode was deposited across nearly the entire 2.5 mm × 3.5 mm surface of the sample. **c**, The relative fraction of the o-phase increased from ~73% before wakeup to ~92% after wakeup, while the t-phase almost disappeared. Phase ratios were calculated based on the integrated area of each deconvoluted peak. **d**, The GIXRD scan with a wide 2θ range of 5° ~ 50° in V<sub>2</sub>O<sub>5</sub> (6 nm)/HZO with 0 cycles, showing HZO and Mo peaks.



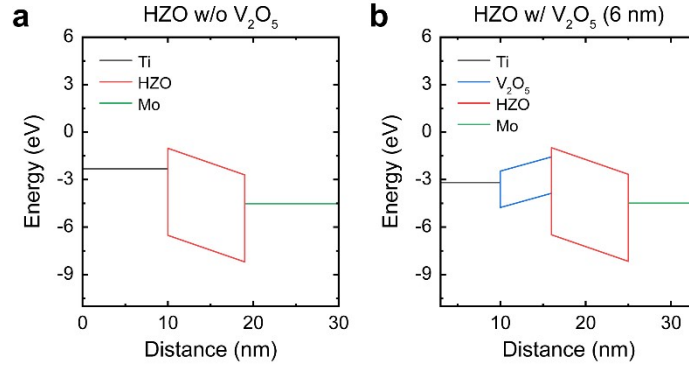

**Figure S8 | Schematic energy band diagrams of HZO capacitors.** The band diagrams were constructed based on the condition where a negative coercive voltage was applied to HZO capacitors **a**, without and **b**, with the  $V_2O_5$  layer, based on  $P-V$  curve in **Fig. 1d**. It was assumed that the interfacial charge at  $V_2O_5$ /HZO interface corresponds to approximately 70% of the polarization in HZO; This interfacial charge was iteratively calculated to match the voltage drop across the HZO layer at the respective coercive voltages of HZO without  $V_2O_5$  and  $V_2O_5$ /HZO capacitors. Under this condition, the voltage drop across HZO layer become identical ( $= -1.68$  V) even though different external voltages were applied, which were  $-2.2$  V for HZO without  $V_2O_5$  and  $-1.3$  V for the HZO with  $V_2O_5$ . This result indicates that the insertion of  $V_2O_5$  layer allows HZO film to achieve the large polarization value even at a lower external voltage due to interfacial charge-assisted field enhancement. The material parameters were set as follows:  $\Phi(\text{Ti}) = 4.0$  eV,  $\Phi(\text{Mo}) = 4.52$  eV;  $\epsilon_r(\text{HZO}) = 30$ ,  $E_g(\text{HZO}) = 5.5$  eV,  $\chi(\text{HZO}) = 2.7$  eV;  $\epsilon_r(\text{V}_2\text{O}_5) = 25$ ,  $E_g(\text{V}_2\text{O}_5) = 2.3$  eV, and  $\chi(\text{V}_2\text{O}_5) = 3.28$  eV (*Nano Converg.* 10, 55 (2023); *J. Mater. Sci.* 21, 20284-20294 (2021)).
